# Supplementary material for: Active recall to increase HIV and STI testing: a systematic review
Source: HighWire-hosted journal article supplement (doi:10.1136/sextrans-2014-051930), 2015-03-10
Supplement: sextrans-2014-051930supp.pdf [file sextrans-2014-051930supp.pdf]

## **Supplementary material**

### **Annex 1: Reasons for study exclusion (N=27)**

- No active recall (N=5)
- Conference abstract (N=4)
- Qualitative study (N=3)
- Health promotion (N=2)
- Reviews (N=2)
- No reattendance outcome (N=1)
- Rescreening rates (N=1)
- Natural history of infection (N=1)
- Drivers and barriers to retesting not active recall (N=1)
- Factors associated with rescreening (N=1)
- Reminder to clinicians (N=1)
- Results for HIV (N=1)
- News article (N=1)
- Overview of prevention (N=1)
- Unable to obtain paper (N=1)
- Same study as an included paper (N=1)

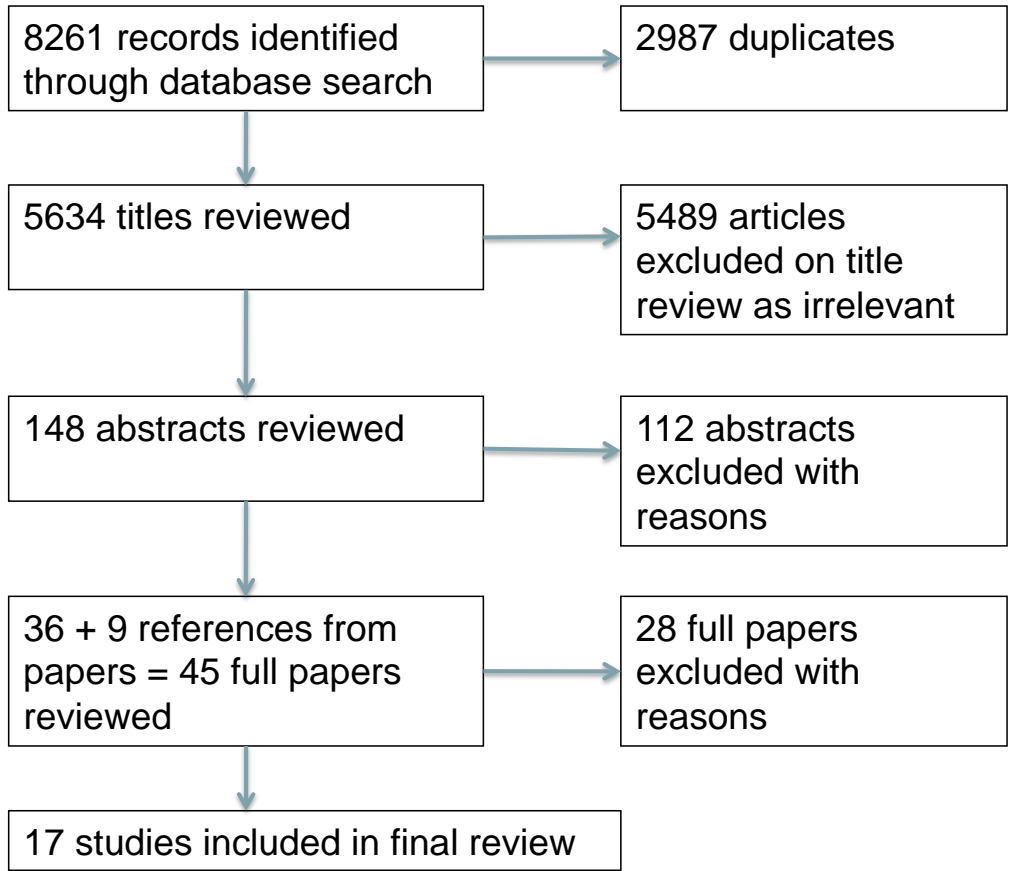

**Figure 1: Flow diagram of review**

## Annex 2: Quality assessment of included studies

Table 1: Summary quality assessment of included studies

|                                                | Internal validity | External validity |
|------------------------------------------------|-------------------|-------------------|
| <b>RCT</b>                                     |                   |                   |
| Cook                                           | ++                | -                 |
| Downing                                        | +                 | +                 |
| Gotz                                           | +                 | -                 |
| Sparks                                         | +                 | -                 |
| Xu                                             | +                 | -                 |
| Malotte                                        | +                 | -                 |
| <b>Non-randomised before and after studies</b> |                   |                   |
| Burton                                         | +                 | -                 |
| Bourne                                         | +                 | -                 |
| Guy                                            | +                 | -                 |
| Zu                                             | +                 | -                 |
| Paneth-Pollack                                 | +                 | -                 |
| <b>Observational studies</b>                   |                   |                   |
| Gotz                                           | ++                | -                 |
| Harte                                          | +                 | -                 |
| LaMontagne                                     | +                 | -                 |
| Walker                                         | +                 | -                 |
| Bloomfield                                     | +                 | -                 |
| Cameron                                        | +                 | -                 |

Key:

**For individual criterion**

- ++ For that particular aspect of the study design, the study has been designed in such a way as to minimise the risk of bias
- + the answer to the question is not clear from the way the study is reported or the study has not addressed all the potential sources of bias for that particular aspect of the study design
- significant sources of bias may persist
- NR study has not reported how that question should have been considered
- NA not applicable for the given study design under review

**For overall external validity/internal validity**

- ++ All or most of the checklist criteria have been fulfilled. Where they have not been fulfilled, the conclusions are very likely to alter
- + some of the checklist criteria have been fulfilled. Where they have not been fulfilled or not adequately described, the conclusions are unlikely to alter
- few or no checklist criteria have been fulfilled and the conclusions are likely or very likely to alter





| <b>OBSERVATIONAL STUDIES</b> |                                             |                    |                         |                   |                         |                         |                             |
|------------------------------|---------------------------------------------|--------------------|-------------------------|-------------------|-------------------------|-------------------------|-----------------------------|
|                              |                                             | Harte<br>STIJ 2010 | Bloomfield<br>STIJ 2003 | Gotz<br>STIJ 2013 | LaMontagne<br>STIJ 2007 | Walker<br>PLoS One 2012 | Cameron<br>Human Reprod 209 |
| POPULATION                   | Source population                           | +                  | +                       | +                 | +                       | +                       | +                           |
|                              | Representativeness                          | +                  | +                       | +                 | +                       | +                       | +                           |
| ALLOCATION                   | Method of selection of participants         | ++                 | ++                      | ++                | ++                      | +                       | +                           |
|                              | Minimisation of selection bias              | +                  | -                       | ++                | ++                      | ++                      | +                           |
|                              | Explanatory variables based on theory       | +                  | -                       | ++                | ++                      | -                       | -                           |
|                              | Low contamination                           | N/A                | N/A                     | N/A               | N/A                     | N/A                     | N/A                         |
|                              | Confounders controlled/adjusted             | N/A                | N/A                     | N/A               | N/A                     | N/A                     | N/A                         |
|                              | Applicable to UK setting                    | ++                 | +                       | +                 | +                       | +                       | ++                          |
| OUTCOMES                     | Reliability                                 | ++                 | +                       | ++                | ++                      | ++                      | ++                          |
|                              | Completeness                                | ++                 | ++                      | ++                | ++                      | ++                      | ++                          |
|                              | Importance of outcomes                      | +                  | +                       | +                 | +                       | +                       | +                           |
|                              | Similarity of follow up times               | N/A                | N/A                     | N/A               | NA                      | N/A                     | N/A                         |
|                              | Relevance of follow up times                | ++                 | -                       | +                 | ++                      | ++                      | ++                          |
|                              | Low withdrawal rate                         | ++                 | ++                      | ++                | ++                      | ++                      | ++                          |
| ANALYSES                     | Power                                       | -                  | -                       | -                 | ++                      | ++                      | ++                          |
|                              | Multiple explanatory variables              | +                  | -                       | ++                | ++                      | +                       | +                           |
|                              | Analytic methods and adjust for confounders | ++                 | ++                      | ++                | ++                      | ++                      | ++                          |
|                              | Precision                                   | ++                 | ++                      | ++                | ++                      | ++                      | ++                          |
| SUMMARY                      | Internal validity                           | +                  | +                       | ++                | +                       | +                       | +                           |
|                              | External validity                           | -                  | -                       | -                 | -                       | -                       | -                           |

### **Annex 3: Full search strategy**

#### *Search terms*

1. HIV
2. STI OR sexually transmit\* infection OR sexually transmit\* disease OR Chlamydia OR gonorrh\*
3. test\* OR screen\*
4. remind\* OR recall OR repeat\* OR rescreen\* OR text OR SMS OR short message service OR mobile OR email OR phone\* OR mobile phone OR telephone
5. (1 OR 2) AND 3 AND 4

### **Annex 4: Funnel plots**

**Figure 2: Funnel plot of the log odds ratio of reattendance plotted against the standard error of the log odds ratio of reattendance for randomized control trials**



Funnel plot with pseudo 95% confidence limits

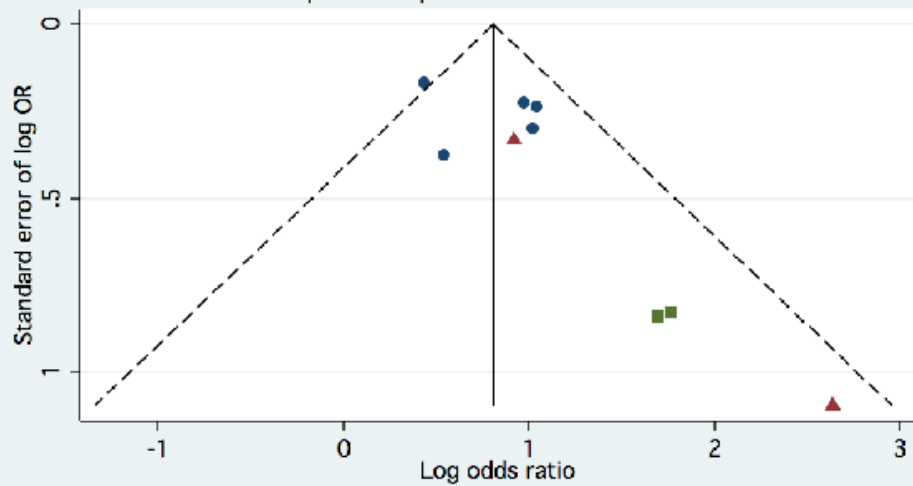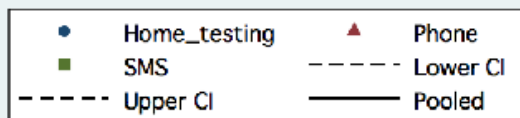

Figure 3: Funnel plot of the log odds ratio of reattendance plotted against the standard error of the log odds ratio of reattendance for observational studies

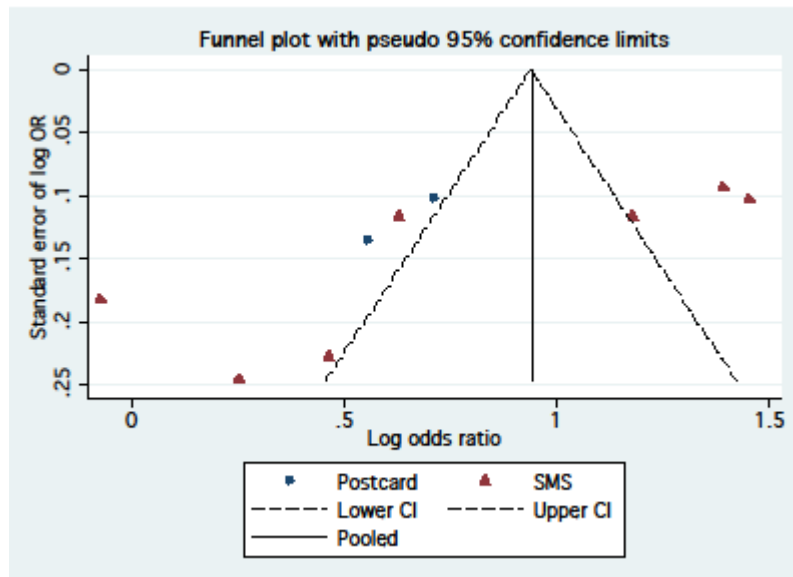

## Annex 5: Clinical outcomes

Table 3: Clinical outcome for randomised control trials

| STUDY                                               | Number of new infection at retest (number of infections/number who retest) |                                |               |                                                     | Number of new infections at recall (number of infections/number who are recalled) |               |                                                     |
|-----------------------------------------------------|----------------------------------------------------------------------------|--------------------------------|---------------|-----------------------------------------------------|-----------------------------------------------------------------------------------|---------------|-----------------------------------------------------|
|                                                     | Clinical outcome                                                           | Intervention group             | Control group | Crude OR (95% CI), statistical finding <sup>2</sup> | Intervention group                                                                | Control group | Crude OR (95% CI), statistical finding <sup>2</sup> |
|                                                     |                                                                            | n/N                            | n/N           |                                                     | n/N                                                                               | n/N           |                                                     |
| <b>Type of intervention: SMS</b>                    |                                                                            |                                |               |                                                     |                                                                                   |               |                                                     |
| Downing et al STIJ 2013 <sup>1</sup>                | Chlamydia infection at retest                                              | 2/8 (25%)                      | 0/2 (0%)      | N/A                                                 | 2/30 (7%)                                                                         | 0/32 (0%)     | N/A                                                 |
| <b>Type of intervention: Phone call/ letter</b>     |                                                                            |                                |               |                                                     |                                                                                   |               |                                                     |
| Malotte et al STD 2004 USA                          | Chlamydia infection at second re-test (i.e. 4.5 months after baseline)     | Not available for all patients | N/A           | N/A                                                 | N/A                                                                               | N/A           | N/A                                                 |
| <b>Type of intervention: send home sampling kit</b> |                                                                            |                                |               |                                                     |                                                                                   |               |                                                     |
| Gotz et al BMC Infect Dis 2013 <sup>1</sup>         | Chlamydia infection at retest                                              | 8/50 (16%)                     | 5/25 (20%)    | OR= 0.8<br>95% CI (0.2, 2.6)                        | 8/109 (7%)                                                                        | 5/107 (5%)    | Calc OR= 1.6<br>(Calc 95% CI 0.4, 6.5)              |
| Sparks et al STD 2004                               | Chlamydia or gonorrhoea infection at retest                                | Not available for all patients | N/A           | N/A                                                 | N/A                                                                               | N/A           | N/A                                                 |

|                                                     |                                     |                                                                                                                       |                                                                                                                             |                                                                                                                        |                                                                            |                                                                              |                                                                                                                     |
|-----------------------------------------------------|-------------------------------------|-----------------------------------------------------------------------------------------------------------------------|-----------------------------------------------------------------------------------------------------------------------------|------------------------------------------------------------------------------------------------------------------------|----------------------------------------------------------------------------|------------------------------------------------------------------------------|---------------------------------------------------------------------------------------------------------------------|
| Xu et al<br>Obstetr<br>Gynacol<br>2011 <sup>1</sup> | Chlamydia<br>infection at<br>retest | STI clinic recruits:<br>17/122 (13.9% ;<br>95% CI 8.3-21.4)<br><br>FP recruits: 12/93<br>(12.9% ; 95% CI<br>6.9-21.5) | STI clinic<br>recruits: 19/98<br>(19.4% ; 95%<br>CI 8.3-21.4)<br><br>FP recruits:<br>8/55 ( 14.6% ;<br>95% CI 6.5-<br>26.7) | STI clinic group:<br>calc OR= 0.7<br>(calc 95% CI 0.3, 1.5)<br><br>FP group:<br>calc OR= 0.9<br>(calc 95% CI 0.3, 2.6) | STI clinic recruits:<br>17/408 (4.2%)<br><br>FP recruits: 12/196<br>(6.1%) | STI clinic<br>recruits: 19/403<br>(4.7%)<br><br>FP recruits:<br>8/208 (3.8%) | STI clinic group:<br>calc OR= 0.9<br>(calc 95% CI 0.4, 1.8)<br><br>FP group: calc OR= 1.6<br>(calc 95% CI 0.6, 4.7) |
| Cook et al<br>STIJ 2007                             | STDs                                | 20.4 per 100 py                                                                                                       | 24.1 per 100 py                                                                                                             | N/A                                                                                                                    | N/A                                                                        | N/A                                                                          | N/A                                                                                                                 |

1. Where number of new infections at retest is not provided by the paper, it has been calculated
2. OR and 95% CI is calculated where not provided in the paper and is specified as 'calc OR' or 'calc 95% CI'

**Table 4: Clinical outcome for observational studies**

| STUDY                            | Number of new infections at retest (number of infections/number who retest) |                    |               |                                        | Number of new infections at recall (number of infections/number who are recalled) |               |                                        |
|----------------------------------|-----------------------------------------------------------------------------|--------------------|---------------|----------------------------------------|-----------------------------------------------------------------------------------|---------------|----------------------------------------|
|                                  | Clinical outcome                                                            | Intervention group | Control group | Crude OR (95% CI), statistical finding | Intervention group                                                                | Control group | Crude OR (95% CI), statistical finding |
|                                  |                                                                             | n/N                | n/N           |                                        | n/N                                                                               | n/N           |                                        |
| <b>Type of intervention: SMS</b> |                                                                             |                    |               |                                        |                                                                                   |               |                                        |
| Bourne et al<br>STIJ 2011        | Not reported                                                                | N/A                | N/A           | N/A                                    | N/A                                                                               | N/A           | N/A                                    |

|                               |                                                                     |                                                                                                                                                                                                                          |                                                                                                                                                                                                                                                                                                                                                                                                                                                                                                               |                                                                                                                                                                                                                                                                                                                                                                                                                                                                                                                                                                                                                                                                                                                                                                                                        |                                                                                                                                                                                                                             |                                                                                                                                                                                                                                                                                                                                                                                                                                                                                                                                                    |                                                                                                                                                                                                                                                                                                                                                                                                                                                                                                                                                                                                                                                                                                                                                                                                                                        |
|-------------------------------|---------------------------------------------------------------------|--------------------------------------------------------------------------------------------------------------------------------------------------------------------------------------------------------------------------|---------------------------------------------------------------------------------------------------------------------------------------------------------------------------------------------------------------------------------------------------------------------------------------------------------------------------------------------------------------------------------------------------------------------------------------------------------------------------------------------------------------|--------------------------------------------------------------------------------------------------------------------------------------------------------------------------------------------------------------------------------------------------------------------------------------------------------------------------------------------------------------------------------------------------------------------------------------------------------------------------------------------------------------------------------------------------------------------------------------------------------------------------------------------------------------------------------------------------------------------------------------------------------------------------------------------------------|-----------------------------------------------------------------------------------------------------------------------------------------------------------------------------------------------------------------------------|----------------------------------------------------------------------------------------------------------------------------------------------------------------------------------------------------------------------------------------------------------------------------------------------------------------------------------------------------------------------------------------------------------------------------------------------------------------------------------------------------------------------------------------------------|----------------------------------------------------------------------------------------------------------------------------------------------------------------------------------------------------------------------------------------------------------------------------------------------------------------------------------------------------------------------------------------------------------------------------------------------------------------------------------------------------------------------------------------------------------------------------------------------------------------------------------------------------------------------------------------------------------------------------------------------------------------------------------------------------------------------------------------|
| Zou et al<br>PLoS One<br>2013 | Bacterial<br>STI<br>(chlamydia,<br>gonorrhoea,<br>syphilis),<br>HIV | pharyngeal Gc:<br>16/885 (1.8%)<br>Rectal Gc: 24/885<br>(2.7%)<br>Urethral Ct: 26/885<br>(2.9%)<br>Rectal Ct: 51/885<br>(5.8%)<br>Early STS: 25/885<br>(2.8%)<br>Early latent STS:<br>12/885 (1.4%)<br>HIV: 7/885 (0.8%) | 1. Concurrent<br>control group:<br>Pharyngeal<br>Gc: 13/978<br>(1.3%)<br>Rectal Gc:<br>12/978 (1.2%)<br>Urethral Ct:<br>14/978 (1.4%)<br>Rectal Ct:<br>27/978 (2.8%)<br>Early STS:<br>15/978 (1.5%)<br>Early latent<br>STS: 4/978<br>(0.4%)<br>HIV: 3/978<br>(0.3%)<br><br>2. Historic<br>control group:<br>Pharyngeal<br>Gc: 11/1454<br>(0.8%)<br>Rectal Gc:<br>14/1454<br>(1.0%)<br>Urethral Ct:<br>14/1454<br>(1.0%)<br>Rectal Ct:<br>22/1454<br>(1.5%)<br>Early STS:<br>30/1454<br>(2.1%)<br>Early latent | 1. Concurrent control:<br>Pharyngeal Gc: calc<br>OR= 1.4<br>(calc 95% CI 0.6, 3.1)<br>Rectal Gc: calc OR=2.2<br>(calc 95% CI 1.1, 5.0)<br>Urethral Ct: calc<br>OR=2.1<br>(calc 95% CI 1.0, 4.3)<br>Rectal Ct: calc OR=2.2<br>(calc 95% CI 1.3, 3.6)<br>Early STS: calc<br>OR=1.9<br>(calc 95% CI 0.9, 3.8)<br>Early latent STS: calc<br>OR=3.3<br>(calc 95% CI 1.0, 14.3)<br>HIV:calc OR=2.6<br>(calc 95% CI 0.6, 15.7)<br><br>2. Historical control:<br>Pharyngeal GC: calc<br>OR= 2.4<br>(calc 95% CI 1.0, 5.8)<br>Rectal Gc: calc OR=2.9<br>(calc 95% CI 1.4, 6.0)<br>Urethral Ct:calc<br>OR=3.1<br>(calc 95% CI 1.6, 6.5)<br>Rectal Ct: calc OR=4.0<br>(calc 95% CI 2.3, 6.9)<br>Early STS: calc<br>OR=1.4<br>(calc 95% CI 0.8, 2.4)<br>Early latent STS: calc<br>OR=1.3<br>(calc 95% CI 0.6, 3.0) | pharyngeal Gc:<br>16/997 (1.6%)<br>Rectal Gc: 24/997<br>(2.4%)<br>Urethral Ct:<br>26/997 (2.6%)<br>Rectal Ct: 51/997<br>(5.1%)<br>Early STS: 25/997<br>(2.5%)<br>Early latent STS:<br>12/997 (1.2%)<br>HIV: 7/997<br>(0.7%) | 1. Concurrent<br>control group:<br>Pharyngeal Gc:<br>13/1382 (1.3%)<br>Rectal Gc:<br>12/1382 (1.2%)<br>Urethral Ct:<br>14/1382 (1.4%)<br>Rectal Ct:<br>27/1382 (2.8%)<br>Early STS:<br>15/1382 (1.5%)<br>Early latent STS:<br>4/1382 (0.4%)<br>HIV: 3/1382<br>(0.3%)<br><br>2. Historical<br>control group:<br>Pharyngeal Gc:<br>11/1800 (0.7%)<br>Rectal Gc:<br>14/1800 (0.7%)<br>Urethral Ct:<br>14/1800 (0.8%)<br>Rectal Ct:<br>22/1800 (1.5%)<br>Early STS:<br>30/1800 (0.8%)<br>Early latent STS:<br>15/1800 (0.2%)<br>HIV: 10/1800<br>(0.2%) | 1. Concurrent control:<br>Pharyngeal Gc: calc OR=<br>1.7<br>(calc 95% CI 0.8, 3.9)<br>Rectal Gc: calc OR=2.8<br>(calc 95% CI 1.3, 6.2)<br>Urethral Ct: calc OR=2.6<br>(calc 95% CI 1.3, 5.4)<br>Rectal Ct:calc OR=2.7<br>(calc 95% CI 1.7, 4.5)<br>Early STS: calc OR=2.4<br>(calc 95% CI 1.2, 4.8)<br>Early latent STS: calc<br>OR=4.2<br>(calc 95% CI 1.3, 17.9)<br>HIV:calc OR=3.2<br>(calc 95% CI 0.7, 19.5)<br><br>2. Historical control:<br>Pharyngeal GC calc OR=<br>2.7<br>(calc 95% CI 1.1, 6.3)<br>Rectal Gc: calc OR=3.1<br>(calc 95% CI 1.6, 6.6)<br>Urethral Ct:calc OR=3.4<br>(calc 95% CI 1.7, 7.1)<br>Rectal Ct: calc OR=4.4<br>(calc 95% CI 2.6, 7.6)<br>Early STS: calc OR=1.5<br>(calc 95% CI 0.8, 2.7)<br>Early latent STS: calc<br>OR=1.4<br>(calc 95% CI 0.6, 3.3)<br>HIV: calc OR=1.3<br>(calc 95% CI 0.4, 3.7) |
|-------------------------------|---------------------------------------------------------------------|--------------------------------------------------------------------------------------------------------------------------------------------------------------------------------------------------------------------------|---------------------------------------------------------------------------------------------------------------------------------------------------------------------------------------------------------------------------------------------------------------------------------------------------------------------------------------------------------------------------------------------------------------------------------------------------------------------------------------------------------------|--------------------------------------------------------------------------------------------------------------------------------------------------------------------------------------------------------------------------------------------------------------------------------------------------------------------------------------------------------------------------------------------------------------------------------------------------------------------------------------------------------------------------------------------------------------------------------------------------------------------------------------------------------------------------------------------------------------------------------------------------------------------------------------------------------|-----------------------------------------------------------------------------------------------------------------------------------------------------------------------------------------------------------------------------|----------------------------------------------------------------------------------------------------------------------------------------------------------------------------------------------------------------------------------------------------------------------------------------------------------------------------------------------------------------------------------------------------------------------------------------------------------------------------------------------------------------------------------------------------|----------------------------------------------------------------------------------------------------------------------------------------------------------------------------------------------------------------------------------------------------------------------------------------------------------------------------------------------------------------------------------------------------------------------------------------------------------------------------------------------------------------------------------------------------------------------------------------------------------------------------------------------------------------------------------------------------------------------------------------------------------------------------------------------------------------------------------------|

|                                                     |                                                           |                                                            |                                                                                 |                                                                                                                                        |                 |                                                                                  |                                                                                                                                        |
|-----------------------------------------------------|-----------------------------------------------------------|------------------------------------------------------------|---------------------------------------------------------------------------------|----------------------------------------------------------------------------------------------------------------------------------------|-----------------|----------------------------------------------------------------------------------|----------------------------------------------------------------------------------------------------------------------------------------|
| Burton et al<br>STIJ 2013                           | All STIs                                                  | 15/91 (17%)                                                | STS: 15/1454<br>(1.0%)<br>HIV: 10/1454<br>(0.7%)                                | HIV: calc OR=1.2<br>(calc 95% CI 0.4, 3.4)                                                                                             |                 |                                                                                  |                                                                                                                                        |
| Guy et al<br>STIJ 2013                              | Not reported                                              | N/A                                                        | N/A                                                                             | N/A                                                                                                                                    | N/A             | N/A                                                                              | N/A                                                                                                                                    |
| <b>Type of intervention: Phone</b>                  |                                                           |                                                            |                                                                                 |                                                                                                                                        |                 |                                                                                  |                                                                                                                                        |
| Harte et al<br>STIJ 2011                            | Bacterial STI (chlamydia, gonorrhoea, syphilis, LGV), HIV | Acute bacterial STI: 15/206 (7.3%)<br><br>HIV:5/168 (3.0%) | N/A                                                                             | N/A                                                                                                                                    | N/A             | N/A                                                                              | N/A                                                                                                                                    |
| <b>Type of intervention: Postcard/letter</b>        |                                                           |                                                            |                                                                                 |                                                                                                                                        |                 |                                                                                  |                                                                                                                                        |
| Paneth-Pollack et al<br>STD 2010                    | Chlamydia and gonorrhoea infection at retest              | 22/179 (12.30%)                                            | 1. Non-intervention group: 58/288 (20.1%)<br>2. Historic control: 24/94 (25.5%) | 1. Non-intervention group: calc OR= 0.6 (calc 95% CI 0.3, 1.0)<br>2. Pre-intervention group: calculated OR= 0.4 (calc 95% CI 0.2, 0.8) | 22/1267 (1.70%) | 1. Non-intervention group: 58/3861 (1.5%)<br>2. Historic control: 24/1092 (2.2%) | 1. Non-intervention group: calc OR= 1.1 (calc 95% CI 0.7, 1.9)<br>2. Pre-intervention group: calculated OR= 0.8 (calc 95% CI 0.4, 1.5) |
| <b>Type of intervention: send home sampling kit</b> |                                                           |                                                            |                                                                                 |                                                                                                                                        |                 |                                                                                  |                                                                                                                                        |
| Bloomfield et al<br>STIJ 2003                       | Chlamydia infection at retest                             | 2/63 (3.2%)                                                | N/A                                                                             | N/A                                                                                                                                    | 2/399 (0.50%)   | N/A                                                                              | N/A                                                                                                                                    |
| Gotz et al<br>STIJ 2013                             | Chlamydia reinfection                                     | 242/2756 (8.8%)                                            | n/a                                                                             | n/a                                                                                                                                    |                 |                                                                                  |                                                                                                                                        |

|                                     |                               |                                                                                                               |     |     |                |     |     |
|-------------------------------------|-------------------------------|---------------------------------------------------------------------------------------------------------------|-----|-----|----------------|-----|-----|
| LaMontagne et al<br>STIJ 2007       | Chlamydia infection at retest | GP recruits: 29.9<br>(95% CI 19.7-45.4)<br>per 100py<br>FP recruits: 22.3<br>(95% CI 15.6-31.8)<br>per 100 py | N/A | N/A | N/A            | N/A | N/A |
| Walker et al<br>PLoS One<br>2012    | Chlamydia infection at retest | 3 months: 7/40<br>(18%)<br>6 months: 25/884<br>(3%)<br>12 months: 15/874<br>(2%)                              | N/A | N/A | N/A            | N/A | N/A |
| Cameron et al<br>Hum Reprod<br>2009 | Chlamydia infection at retest | 32/215 (15%)                                                                                                  | N/A | N/A | 32/330 (9.70%) | N/A | N/A |
